# Supplementary material for: Inter-Laboratory Comparison of RT-PCR-Based Methods for the Detection of Tomato Brown Rugose Fruit Virus on Tomato
Source: MDPI journal article supplement (doi:10.3390/pathogens11020207), 2022-02-03
Supplement: s1 [file s1]

## Supplementary Material

**Supplementary material Table S1.** List of Real Time RT-PCR kits and reagents used by the TPS participants and number of data set for each type. (\*) highlights the recommended master mixes.

| Real Time RT-PCR Kits                                          | n° of data set |
|----------------------------------------------------------------|----------------|
| TaqMan® RNA-to-Ct™ 1-Step Kit (LifeTecnologies)*               | 14             |
| iTaq One-Step Mastermix (Biorad)*                              | 8              |
| Luna® Universal Probe One-Step RT-qPCR Kit (NEB)               | 2              |
| Ultraplex 1-Step Toughmix (Quantabio)                          | 2              |
| GoTaq Probe 1-Step RT-qPCR (Promega)                           | 1              |
| qScript™ XLT One-Step RT-qPCR ToughMix® (Quantabio)            | 1              |
| AgPath ID one-step RT qPCR kit (Ambion)                        | 1              |
| qMAXSen™ One-Step Probe RT-qPCR Kit (CANVAX)                   | 1              |
| SS IV and Maxima Probe/ROX qPCR Master Mix (Thermo scientific) | 1              |
| CAPITAL™ qRT-PCR Probe Mix (Biotechrabbit)                     | 1              |
| TaqMan® Fast Virus 1-Step Master Mix (Applied Biosystem)       | 1              |
| Reliance one-step Multiplex supermix (Biorad)                  | 1              |

**Supplementary material Table S2.** Reproducibility values obtained for all the tests by each participant (considering valid data set). (–) = data set not provided.

|     | L1  | L2  | L4  | L5  | L6  | L7  | L10 | L11 | L12 | L14 | L15 | L16 | L17 | L18 | L19 | L20 |
|-----|-----|-----|-----|-----|-----|-----|-----|-----|-----|-----|-----|-----|-----|-----|-----|-----|
| ALK | 92% | 92% | 81% | 90% | 84% | 84% | -   | 89% | -   | 92% | -   | 74% | 78% | 73% | 92% | 92% |
| LOE | 77% | 78% | 81% | 85% | 83% | 79% | -   | 83% | -   | 77% | -   | 80% | 79% | 70% | 85% | 83% |
| ISH | 79% | 76% | 74% |     |     | 66% | 65% | 73% |     |     | 65% | 70% | 74% | 68% | 66% | 78% |
| M&W | 81% | 77% | 76% |     |     | 69% | 66% | 80% |     |     | 66% | 71% | 77% | 76% | 71% | 78% |
| PAN | 88% | 74% | 82% |     |     | 88% | -   | 85% | 82% | -   | 82% | 75% | 75% | 84% | 80% | 88% |
|     | L21 | L22 | L23 | L24 | L25 | L26 | L27 | L28 | L29 | L30 | L31 | L32 | L33 | L34 | L35 |     |
| ALK | 84% | 80% | 92% | -   |     | 92% | 92% |     | 92% | 92% | 92% | 90% | -   | -   | -   |     |
| LOE | 85% | 77% | 81% | -   |     | 83% | 83% |     | -   | 77% | 85% | 85% | -   | -   | -   |     |
| ISH | 74% | 74% | 62% | 79% | 65% | 71% | 63% |     |     | 71% | 75% | 78% | 76% |     | 74% |     |
| M&W | 81% | 76% | 71% | 80% | 66% | 78% | 65% |     |     | 81% | 75% | 78% | 77% | 79% | 81% |     |
| PAN | 75% | 80% | 83% | 82% | 71% | 82% | 69% | 67% |     | 88% |     | -   | 85% |     | -   |     |

**Supplementary material Table S3.** List of TSP participants

| Participants                                                                                            |
|---------------------------------------------------------------------------------------------------------|
| AGROINNOVA - University of Torino – UNITO, Italy                                                        |
| Agroscope, Switzerland                                                                                  |
| ANSES - Laboratoire de la Santé des Végétaux – ANSES - LSV-UBVO, France                                 |
| Bactochem, Israel                                                                                       |
| BASF Vegetable Seeds (BVS) – BASF, The Netherlands                                                      |
| BIOREBA AG, Switzerland                                                                                 |
| Centre for Research Experimentation and Training in Agriculture (CRSFA) “Basile Caramia” – CRSFA, Italy |
| Centro attività vivaistiche – CAV, Italy                                                                |
| Fera Science Limited, UK                                                                                |
| Finnish Food Authority / Plant analytics / D120, Finland                                                |
| Hazera Seeds - Hazera Health lab, Israel                                                                |

|                                                                                                                                                      |
|------------------------------------------------------------------------------------------------------------------------------------------------------|
| Institute of plant protection - DLR Rheinpfalz, Germany                                                                                              |
| Instituto Nacional de Investigação Agrária, Plant Virology Laboratory – INIAV, Portugal                                                              |
| Instituto Nacional de Investigación y Tecnología Agraria y Alimentaria – INIA, Spain                                                                 |
| Israel Plant Protection and Inspection services Virology Laboratory – PPIS, Israel                                                                   |
| Julius Kühn-Institut, Inst. für Epidemiologie und Pathogendiagnostik - JKI-EPV, Germany                                                              |
| Laboratorio SFR Lombardia c/o Fondazione Minoprio, Italy                                                                                             |
| Leibniz Institute – DSMZ, Germany                                                                                                                    |
| LOEWE Biochemica GmbH – LOEWE, Germany                                                                                                               |
| Main Inspectorate of Plant Health and Seed Inspection Central Laboratory – GIORIn, Poland                                                            |
| Microlab, Israel                                                                                                                                     |
| Naktuinbouw, The Netherlands                                                                                                                         |
| National Institute of Biology, Department of Biotechnology and Systems Biology – NIB, Slovenia                                                       |
| Netherlands Food and Consumer Product Safety Authority (NVWA) National Reference Centre (NRC) - NVWA – NRC, The Netherlands                          |
| Österreichische Agentur für Gesundheit und Ernährungssicherheit, Abteilung für molekularbiologische Diagnose von Pflanzenkrankheiten – AGES, Austria |
| Phytopathology Laboratory, Agro-Bio Tech, University of Liège – ULG, Belgium                                                                         |
| Plant Health and Environment Laboratory – PHEL, New Zealand                                                                                          |
| Plant Health and Microbiology Laboratory- PHML, Estonia                                                                                              |
| Plant Health Diagnostic National Reference Laboratory – PHDL, Hungary                                                                                |
| Research Institute for Agriculture, Fisheries and Food – ILVO, Belgium                                                                               |
| Scientia Terrae vzw – STRI, Belgium                                                                                                                  |
| University of Palermo, Plant Virology Lab, Italy                                                                                                     |
| Ústřední kontrolní a zkušební ústav zemědělský – Ukzuz, the Czech Republic                                                                           |
| Wageningen Plant Research – WPR, The Netherlands                                                                                                     |
